# Supplementary material
Source: PubMed Central journal article supplement (PMC3754037)
Supplement: JVI.03152-12_zjv999097939so1.pdf [file JVI.03152-12_zjv999097939so1.pdf]

1 **Supplemental Information**

2 **Movie S1. IBDV VP3 containing vesicles are located outside the Golgi**  
3 **stacks.** A movie was generated from the 3D reconstructions of VP3 and YFP-  
4 SialT2 obtained for Fig.5B (panels e to h). The ImageJ software was employed  
5 to generate an x-axis 360-degree rotation with a rotation interval of 2.00 degree.
